# Supplementary material for: Novel potassium N-[(2S,3R,4R,5R)-2,3,4,5,6-pentahydroxylhex-1-yl]-l-amino acid dichloroplatinates(II) with high anti-tumor activity and low side reaction
Source: Royal Society of Chemistry journal article supplement (doi:10.1039/c2mt00005a), 2012-01-01
Supplement: c2mt00005a.pdf [file c2mt00005a.pdf]

## Supplementary Information

### **Novel potassium N-[(2S,3R,4R,5R)-2,3,4,5,6-Pentahydroxylhex-1-yl]-L-amino acid dichloroplatinates(II) with high anti-tumor activity and low side reaction**

Yuji Wang, Guifeng Kang, Jiawang Liu, Ming Zhao, Jianhui Wu, Xiaoyi Zhang, Ye Li, Xiaobo Zhong, Yifan Yang and Shiqi Peng

#### **Contents**

**I. Analytic data of 4a-c and 5a-c**

**II. Platinum in the organs and tissues of the mice receiving 5a,5b&5c (Table S1-3)**

**N-[(2S,3R,4R,5R)-2,3,4,5,6-Pentahydroxylhex-1-yl]-L-threonine (4a)**

Yield: 25%, colorless powders, Mp 195 - 197 °C.  $[\alpha]_D^{20} = -19.0$  (c 2.0, H<sub>2</sub>O). IR (KBr): 3421, 2975, 2939, 1612, 1571, 1415, 1385, 1084, 1045, 841, 756, 731. ESI-MS (m/e): 284 [M + H]<sup>+</sup>; <sup>1</sup>H NMR (D<sub>2</sub>O):  $\delta = 4.12$  (m,  $J = 4.6$  Hz, 1H), 3.95 (d,  $J = 4.5$  Hz, 1H), 3.81 (m,  $J = 4.5$  Hz, 1H), 3.80 (m,  $J = 3.4$  Hz, 1H), 3.75 (m,  $J = 3.6$  Hz, 1H), 3.64 (m,  $J = 4.1$  Hz, 2H), 3.57 (d,  $J = 4.7$  Hz, 1H), 3.26 (dd,  $J = 3.1$  Hz,  $J = 13.0$  Hz, 1H), 3.12 (dd,  $J = 10.1$  Hz,  $J = 13.0$  Hz, 1H), 1.24 (d,  $J = 4.7$  Hz, 3H). Anal Calcd for C<sub>10</sub>H<sub>21</sub>NO<sub>8</sub>: C 42.40, H 7.47, N 4.94; Found: C 42.57, H 7.64, N 4.77.

**N-[(2S,3R,4R,5R)-2,3,4,5,6-Pentahydroxylhex-1-yl]-L-tryptophane (4b)**

Yield: 22%, colorless powders, Mp 206 - 207 °C.  $[\alpha]_D^{25} = 10.0$  (c 2.0, H<sub>2</sub>O). IR (KBr): 3407, 3353, 3095, 2968, 2916, 1617, 1400, 1354, 1080, 1041, 742, 675, 534. ESI-MS (m/e): 369 [M + H]<sup>+</sup>; <sup>1</sup>H NMR (D<sub>2</sub>O):  $\delta = 7.22$  (d,  $J = 7.5$  Hz, 1H), 7.20 (d,  $J = 7.5$  Hz, 1H), 7.16 (t,  $J = 7.8$  Hz, 1H), 7.14 (t,  $J = 7.7$  Hz, 1H), 6.92 (s, 1H), 4.16 (m,  $J = 4.9$  Hz, 1H), 3.90 (t,  $J = 5.0$  Hz, 1H), 3.85 (m,  $J = 5.2$  Hz, 1H), 3.83 (m,  $J = 5.3$  Hz, 1H), 3.77 (m,  $J = 3.9$  Hz, 1H), 3.71 (d,  $J = 5.3$  Hz, 2H), 3.27 (dd,  $J = 3.6$  Hz,  $J = 12.9$  Hz, 1H), 3.20 (dd,  $J = 9.3$  Hz,  $J = 12.9$  Hz, 1H), 2.93 (d,  $J = 4.9$  Hz, 2H). Anal Calcd for C<sub>17</sub>H<sub>24</sub>N<sub>2</sub>O<sub>7</sub>: C 55.43, H 6.57, N 7.60; Found: C 55.25, H 6.39, N 7.76.

**N-[(2S,3R,4R,5R)-2,3,4,5,6-Pentahydroxylhex-1-yl]-L-arginine (4c)**

Yield: 28%, colorless powders, Mp 186 - 187 °C.  $[\alpha]_{\text{D}}^{20} = -65.0$  (c 2.0, H<sub>2</sub>O). IR (KBr): 3437, 3150, 2925, 2882, 1642, 1510, 1396, 1078, 1026, 905. ESI-MS (m/e): 339 [M + H]<sup>+</sup>; <sup>1</sup>H NMR (D<sub>2</sub>O):  $\delta = 4.08$  (m,  $J = 4.9$  Hz, 1H), 3.82(m,  $J = 5.0$  Hz, 1H), 3.79 (m,  $J = 5.1$  Hz, 1H), 3.76 (m,  $J = 3.9$  Hz, 1H), 3.65 (m,  $J = 5.2$  Hz, 2H), 3.60 (t,  $J = 4.7$  Hz, 1H), 3.29 (dd,  $J = 3.3$  Hz,  $J = 12.5$ Hz, 1H), 3.18 (dd,  $J = 9.0$  Hz,  $J = 12.6$  Hz, 1H), 2.68 (t,  $J = 4.7$  Hz, 2H), 1.66 (m,  $J = 4.6$  Hz, 2H), 1.56 (m,  $J = 4.8$  Hz, 2H).  
Anal Calcd for C<sub>12</sub>H<sub>26</sub>N<sub>4</sub>O<sub>7</sub>: C 42.60, H 7.75, N 16.56; Found: C 42.46, H 7.51, N 16.73.

**Potassium N-[(2S,3R,4R,5R)-2,3,4,5,6-pentahydroxylhex-1-yl]-L-threonine dichloro-platinate (II) (5a)**

Yield: 83%, yellow powders, Mp 210 - 212 °C,  $[\alpha]_{\text{D}}^{20} = -38.4$  (c 1.6, H<sub>2</sub>O). IR (KBr): 3428, 2926, 1645, 1385, 1323, 1080, 870. ESI-MS (m/e): 589 [M + H]<sup>+</sup>; <sup>1</sup>H NMR (D<sub>2</sub>O):  $\delta = 4.22$  (t,  $J = 6.5$  Hz, 1H), 3.90 (dd,  $J = 3.0$  Hz,  $J = 8.0$  Hz, 1H), 3.80 (dd,  $J = 2.0$  Hz,  $J = 5.5$  Hz, 1H), 3.78 (dd,  $J = 2.0$  Hz,  $J = 5.0$  Hz, 1H), 3.67 (m,  $J = 3.0$  Hz, 2H), 3.65 (m,  $J = 6.5$  Hz, 1H), 3.28 (d,  $J = 8.0$  Hz, 1H), 3.20 (dd,  $J = 2.5$  Hz,  $J = 13.5$  Hz, 1H), 3.07 (dd,  $J = 10.0$  Hz,  $J = 13.5$  Hz, 1H), 1.38 (d,  $J = 6.0$  Hz, 3H). Anal Calcd for C<sub>10</sub>H<sub>20</sub>Cl<sub>2</sub>KNO<sub>8</sub>Pt: C, 20.45; H, 3.43; N, 2.38; Found: C, 20.24; H, 3.30; N, 2.64.

**Potassium N-[(2S,3R,4R,5R)-2,3,4,5,6-pentahydroxylhex-1-yl]-L-tryptophane dichloro-platinate (II) (5b)**

Yield: 89%, yellow powders, Mp 226 - 229 °C.  $[\alpha]_D^{20} = -15.3$  (c 1.7, H<sub>2</sub>O). IR (KBr): 3459, 3364, 2973, 2887, 1702, 1605, 1512, 1404, 1369, 1217, 1078, 775. ESI-MS (m/e): 671 [M + H]<sup>+</sup>; <sup>1</sup>H NMR (D<sub>2</sub>O):  $\delta = 7.21$  (d,  $J = 8.0$  Hz, 1H), 7.19 (d,  $J = 7.5$  Hz, 1H), 7.15 (t,  $J = 7.0$  Hz, 1H), 7.12 (t,  $J = 6.5$  Hz, 1H), 6.89 (s, 1H), 4.10 (m,  $J = 5.0$  Hz, 1H), 3.83 (t,  $J = 5.0$  Hz, 1H), 3.79 (m,  $J = 5.5$  Hz, 1H), 3.74 (m,  $J = 5.0$  Hz, 1H), 3.70 (m,  $J = 4.5$  Hz, 1H), 3.66 (d,  $J = 5.0$  Hz, 2H), 3.24 (dd,  $J = 4.0$  Hz,  $J = 11.0$  Hz, 1H), 3.10 (dd,  $J = 9.0$  Hz,  $J = 10.5$  Hz, 1H), 2.86 (d,  $J = 5.0$  Hz, 2H). Anal Calcd for C<sub>17</sub>H<sub>23</sub>Cl<sub>2</sub>KN<sub>2</sub>O<sub>7</sub>Pt: C, 30.36; H, 3.45; N, 4.17; Found: C, 30.14; H, 3.31; N, 4.41.

**Potassium N-[(2S,3R,4R,5R)-2,3,4,5,6-pentahydroxylhex-1-yl]-L-arginine  
dichloro-platinate (II) (5c)**

Yield: 88%, yellow powders, Mp 209 - 211 °C.  $[\alpha]_D^{20} = -83.7$  (c 2.3, H<sub>2</sub>O). IR (KBr): 3491, 3209, 2958, 2868, 1685, 1556, 1416, 1202, 1082, 903. ESI-MS (m/e): 643 [M + H]<sup>+</sup>; <sup>1</sup>H NMR (D<sub>2</sub>O):  $\delta = 4.06$  (m,  $J = 4.5$  Hz, 1H), 3.91 (m,  $J = 5.0$  Hz, 1H), 3.80 (m,  $J = 4.5$  Hz, 1H), 3.76 (dd,  $J = 5.0$  Hz,  $J = 6.5$  Hz, 1H), 3.72 (m,  $J = 5.5$  Hz, 1H), 3.65 (m,  $J = 4.5$  Hz, 2H), 3.32 (m,  $J = 7.0$  Hz, 1H), 3.18 (dd,  $J = 6.0$  Hz,  $J = 11.0$  Hz, 1H) 2.62 (t,  $J = 4.5$  Hz, 2H), 1.63 (m,  $J = 4.0$  Hz, 2H), 1.52 (m,  $J = 4.5$  Hz, 2H). Anal Calcd for C<sub>12</sub>H<sub>25</sub>C<sub>12</sub>KN<sub>4</sub>O<sub>7</sub>Pt: C, 22.43; H, 3.92; N, 8.72; Found: C, 22.21; H, 3.80; N, 8.50.

Table S1 Platinum in the organs of the mice receiving **5a-c**<sup>a</sup>

| Compd.    | Spleen                   | Kidney                   | Liver                    | Brain                    | Heart                    |
|-----------|--------------------------|--------------------------|--------------------------|--------------------------|--------------------------|
| Cisplatin | 6.03 ± 1.37              | 12.31 ± 3.97             | 11.81 ± 2.35             | 0.86 ± 0.25              | 1.67 ± 0.49              |
| Oxaplatin | 4.02 ± 0.95              | 5.56 ± 1.15              | 9.64 ± 1.55              | 0.49 ± 0.11              | 1.06 ± 0.27              |
| <b>5a</b> | 4.05 ± 1.06              | 4.86 ± 1.30 <sup>c</sup> | 9.06 ± 1.15              | 0.19 ± 0.08 <sup>b</sup> | 0.51 ± 0.22 <sup>b</sup> |
| <b>5b</b> | 2.25 ± 0.36 <sup>b</sup> | 3.56 ± 0.42 <sup>b</sup> | 6.06 ± 1.05 <sup>b</sup> | 0.08 ± 0.01 <sup>b</sup> | 0.11 ± 0.02 <sup>b</sup> |
| <b>5c</b> | 3.65 ± 0.93 <sup>c</sup> | 8.23 ± 1.58 <sup>c</sup> | 8.29 ± 1.18 <sup>c</sup> | 0.43 ± 0.10 <sup>c</sup> | 1.22 ± 0.22 <sup>c</sup> |

a) Organ platinum is represented by  $\bar{x} \pm \text{SD}$   $\mu\text{g}$  platinum per g of organ; Dose of cisplatin, oxaliplatin and **5a-c**: 1.67  $\mu\text{mol}/\text{kg}$ ; n = 10; b) Compare to cisplatin and oxaliplatin p<0.01; c) Compare to cisplatin p<0.01.

Table S2 Platinum in blood, bone and tumor of the mice receiving **5a-c**<sup>a</sup>

| Compd.    | Blood platinum           | Femur platinum           | Tumor platinum           |
|-----------|--------------------------|--------------------------|--------------------------|
| Cisplatin | 6.31 ± 1.10              | 19.12 ± 2.92             | 8.74 ± 2.23              |
| Oxaplatin | 5.64 ± 1.56              | 16.84 ± 2.19             | 7.04 ± 1.12              |
| <b>5a</b> | 3.37 ± 1.06 <sup>d</sup> | 5.74 ± 1.31 <sup>b</sup> | 7.45 ± 1.31              |
| <b>5b</b> | 1.38 ± 0.53 <sup>b</sup> | 5.01 ± 1.74 <sup>b</sup> | 8.87 ± 1.08 <sup>c</sup> |
| <b>5c</b> | 1.30 ± 0.34 <sup>b</sup> | 5.72 ± 0.92 <sup>b</sup> | 5.84 ± 0.89 <sup>d</sup> |

a) Bone or tumor platinum is represented by  $\bar{x} \pm \text{SD}$   $\mu\text{g}$  platinum per g of bone or tumor; Blood platinum is represented by  $\bar{x} \pm \text{SD}$   $\mu\text{g}$  platinum per mL of blood; NS (normal saline) = vehicle; Dose of cisplatin, oxaliplatin and **5a-c**: 1.67  $\mu\text{mol}/\text{kg}$ ; n=10; b) Compared to cisplatin and oxaliplatin p<0.01; c) Compared to oxaliplatin p<0.05; d) Compared to cisplatin p<0.01.

Table S3 Platinum in the urine and feces of the mice receiving **5a-c**<sup>a</sup>

| Compd.      | Urine platinum             | Fecal platinum            |
|-------------|----------------------------|---------------------------|
| Cisplatin   | 26.93 ± 3.93               | 6.34 ± 2.64               |
| Oxaliplatin | 122.39 ± 9.36              | 15.28 ± 2.95              |
| <b>5a</b>   | 119.68 ± 5.84 <sup>c</sup> | 31.41 ± 4.56 <sup>b</sup> |
| <b>5b</b>   | 163.60 ± 8.58 <sup>b</sup> | 37.01 ± 4.13 <sup>b</sup> |
| <b>5c</b>   | 138.38 ± 7.82 <sup>b</sup> | 28.05 ± 5.94 <sup>b</sup> |

a) Urinary and fecal platinum is represented by  $\bar{x} \pm \text{SD}$   $\mu\text{g}$  platinum per g of urine and feces, n = 10; Dose of cisplatin, oxaliplatin and **5a-c**: 1.67  $\mu\text{mol}/\text{kg}$ ; b) Compared to cisplatin and oxaliplatin p<0.01; c) Compared to cisplatin p<0.01.
